# Supplementary material for: Role of the Environment Polarity on the Photophysical Properties of Mesogenic Hetero-Polymetallic Complex
Source: Preprints.org preprint supplement (doi:10.20944/preprints202312.0457.v1), 2023-12-07
Supplement: Supplementary file 4 [file supplementary]

SUPPLIMENTARY MATERIAL

for

Role of the environment polarity on the photophysical properties of mesogenic hetero-bimetallic complex

Adelina A. Andelescu 1, Angela Candreva 2, Evelyn Popa 1, Alexandru Vişan 1, Carmen Cretu 1 , Massimo La Deda 2,3*and Elisabeta I. Szerb 1,*

1 “Coriolan Drăgulescu” Institute of Chemistry, Romanian Academy, 24 Mihai Viteazu Bvd. 3200-Timisoara, Romania; ict@acad-icht.tm.edu.ro

2 Department of Chemistry and Chemical Technologies, University of Calabria, 87036 Rende, Italy

3 Institute of Nanotechnology (NANOTEC), National Research Council (CNR), UOS Cosenza, 87036 Rende, Italy

***** Correspondence: [eszerb@acad-icht.tm.edu.ro](mailto:eszerb@acad-icht.tm.edu.ro); [massimo.ladeda@unical.it](mailto:massimo.ladeda@unical.it)

Absorption spectrum of **L1** in dichloromethane solution. **Figure S1**…………………………………………..2

Emission spectrum of **L1** in dichloromethane solution. **Figure S2**……………………………………………..2

Absorption spectrum of **L2** in dichloromethane solution. **Figure S3**…………………………………………..3

Emission spectrum of **L2** in dichloromethane solution. **Figure S4**……………………………………..………3

**Figure S1**. Absorption spectrum of **L1** in dichloromethane solution.

**Figure S2**. Emission spectrum of **L1** in dichloromethane solution.

**Figure S3**. Absorption spectrum of **L2** in dichloromethane solution.

**Figure S4**. Emission spectrum of **L2** in dichloromethane solution.
